# Supplementary material for: In vitro test of external Qigong
Source: Springer Nature journal article supplement (doi:10.1186/1472-6882-4-5), 2004-03-15
Supplement: Additional file 1 [file 1472-6882-4-5-s1.doc]

Yount Qigong Supplementary Table

| Study | Experimental Treatment | **Treatment mean** | **Sham mean** | **Ratio (Q/S)** | **Ln (Q/S)**  Includes original data for all experiments: The supplementary table presents original data for all experiments in the three studies, including: 1) whether each experiment was comparing Qigong/sham or sham/sham, 2) the mean colony counts for each group of samples, 3) the ratio of these mean values and 4) the natural logarithm of these ratios. |
| --- | --- | --- | --- | --- | --- |
| Pilot | Qigong | 28.83 | 26.33 | 1.095 | 0.091 |
| Pilot | Qigong | 25.17 | 24.60 | 1.023 | 0.023 |
| Pilot | Sham | 49.50 | 49.33 | 1.003 | 0.003 |
| Pilot | Sham | 30.00 | 35.50 | 0.845 | -0.168 |
| Pilot | Sham | 29.00 | 32.17 | 0.902 | -0.104 |
| Pilot | Sham | 34.00 | 29.83 | 1.140 | 0.131 |
| Pilot | Qigong | 31.17 | 31.50 | 0.989 | -0.011 |
| Pilot | Qigong | 46.33 | 43.67 | 1.061 | 0.059 |
| Formal | Sham | 1.50 | 2.33 | 0.643 | -0.442 |
| Formal | Sham | 3.33 | 3.17 | 1.053 | 0.051 |
| Formal | Qigong | 4.17 | 3.17 | 1.316 | 0.274 |
| Formal | Sham | 4.83 | 5.00 | 0.967 | -0.034 |
| Formal | Qigong | 4.00 | 3.50 | 1.143 | 0.134 |
| Formal | Sham | 4.40 | 4.83 | 0.910 | -0.094 |
| Formal | Qigong | 4.17 | 4.00 | 1.042 | 0.041 |
| Formal | Sham | 8.33 | 7.50 | 1.111 | 0.105 |
| Formal | Qigong | 7.00 | 5.33 | 1.312 | 0.272 |
| Formal | Sham | 10.17 | 8.00 | 1.271 | 0.240 |
| Formal | Qigong | 9.33 | 6.83 | 1.366 | 0.312 |
| Formal | Sham | 8.50 | 11.17 | 0.761 | -0.273 |
| Formal | Qigong | 9.17 | 9.67 | 0.948 | -0.053 |
| Formal | Sham | 8.00 | 7.33 | 1.091 | 0.087 |
| Formal | Qigong | 8.00 | 6.00 | 1.333 | 0.288 |
| Formal | Sham | 7.50 | 7.83 | 0.957 | -0.044 |
| Formal | Qigong | 7.33 | 6.33 | 1.158 | 0.147 |
| Formal | Sham | 10.33 | 7.50 | 1.378 | 0.321 |
| Formal | Qigong | 9.00 | 7.83 | 1.149 | 0.139 |
| Formal | Sham | 3.67 | 3.33 | 1.100 | 0.095 |
| Formal | Qigong | 2.50 | 2.83 | 0.882 | -0.125 |
| Formal | Sham | 14.33 | 16.33 | 0.878 | -0.131 |
| Formal | Qigong | 15.67 | 15.00 | 1.044 | 0.044 |
| Formal | Sham | 14.00 | 13.17 | 1.063 | 0.061 |
| Formal | Qigong | 15.17 | 17.00 | 0.892 | -0.114 |
| Formal | Sham | 14.50 | 13.17 | 1.101 | 0.097 |
| Formal | Qigong | 12.33 | 12.33 | 1.000 | 0.000 |
| Formal | Sham | 37.00 | 36.17 | 1.023 | 0.023 |
| Formal | Qigong | 29.67 | 30.67 | 0.967 | -0.033 |
| Replication | Sham | 0.50 | 3.00 | 0.167 | -1.792 |
| Replication | Qigong | 0.50 | 1.50 | 0.333 | -1.099 |
| Replication | Qigong | 1.67 | 2.17 | 0.769 | -0.262 |
| Replication | Qigong | 13.33 | 13.50 | 0.988 | -0.012 |
| Replication | Qigong | 0.83 | 0.33 | 2.502 | 0.917 |
| Replication | Qigong | 0.50 | 0.20 | 2.500 | 0.916 |
| Replication | Qigong | 0.17 | 0.17 | 1.000 | 0.000 |
| Replication | Sham | 0.83 | 0.83 | 1.000 | 0.000 |
| Replication | Sham | 0.83 | 4.00 | 0.208 | -1.569 |
| Replication | Qigong | 3.17 | 1.33 | 2.376 | 0.865 |
| Replication | Sham | 1.67 | 0.83 | 2.000 | 0.693 |
| Replication | Qigong | 2.67 | 2.33 | 1.143 | 0.134 |
| Replication | Sham | 1.00 | 1.00 | 1.000 | 0.000 |
| Replication | Qigong | 1.17 | 1.50 | 0.778 | -0.251 |
| Replication | Qigong | 2.50 | 0.50 | 5.000 | 1.609 |
| Replication | Sham | 6.50 | 5.83 | 1.114 | 0.108 |
| Replication | Sham | 5.17 | 3.17 | 1.632 | 0.490 |
| Replication | Sham | 4.33 | 4.33 | 1.000 | 0.000 |
| Replication | Qigong | 4.33 | 3.17 | 1.368 | 0.314 |
| Replication | Qigong | 2.17 | 2.00 | 1.083 | 0.080 |
| Replication | Qigong | 3.83 | 3.20 | 1.198 | 0.181 |
| Replication | Sham | 2.33 | 3.83 | 0.609 | -0.496 |
| Replication | Qigong | 2.50 | 4.83 | 0.517 | -0.659 |
| Replication | Sham | 3.83 | 2.33 | 1.643 | 0.496 |
| Replication | Sham | 2.83 | 1.83 | 1.545 | 0.435 |
| Replication | Sham | 3.67 | 2.67 | 1.375 | 0.319 |
| Replication | Qigong | 2.50 | 3.00 | 0.833 | -0.182 |
| Replication | Sham | 5.17 | 3.50 | 1.476 | 0.390 |
| Replication | Qigong | 3.33 | 3.50 | 0.952 | -0.049 |
| Replication | Sham | 2.67 | 3.67 | 0.727 | -0.319 |
| Replication | Qigong | 8.17 | 9.17 | 0.891 | -0.116 |
| Replication | Qigong | 9.00 | 10.17 | 0.885 | -0.122 |
| Replication | Sham | 9.17 | 9.17 | 1.000 | 0.000 |
| Replication | Sham | 12.50 | 11.17 | 1.119 | 0.113 |
| Replication | Qigong | 7.83 | 8.83 | 0.887 | -0.120 |
| Replication | Qigong | 7.83 | 10.50 | 0.746 | -0.293 |
| Replication | Sham | 12.00 | 10.17 | 1.180 | 0.166 |
| Replication | Sham | 12.50 | 12.50 | 1.000 | 0.000 |
| Replication | Sham | 12.83 | 11.83 | 1.085 | 0.081 |
| Replication | Sham | 12.67 | 11.50 | 1.101 | 0.097 |
| Replication | Qigong | 12.00 | 11.67 | 1.029 | 0.028 |
| Replication | Qigong | 12.00 | 10.17 | 1.180 | 0.166 |
| Replication | Sham | 9.67 | 10.33 | 0.935 | -0.067 |
| Replication | Sham | 9.00 | 12.50 | 0.720 | -0.329 |
| Replication | Sham | 11.50 | 11.00 | 1.045 | 0.045 |
| Replication | Qigong | 13.00 | 12.17 | 1.068 | 0.066 |
| Replication | Qigong | 9.33 | 8.83 | 1.057 | 0.055 |
| Replication | Qigong | 11.67 | 10.83 | 1.077 | 0.074 |
| Replication | Sham | 13.17 | 13.83 | 0.952 | -0.049 |
| Replication | Sham | 8.17 | 9.67 | 0.845 | -0.169 |
| Replication | Qigong | 12.50 | 12.83 | 0.974 | -0.026 |
| Replication | Sham | 11.17 | 12.50 | 0.893 | -0.113 |
| Replication | Sham | 12.83 | 11.33 | 1.132 | 0.124 |
| Replication | Sham | 10.00 | 10.17 | 0.984 | -0.017 |
| Replication | Qigong | 10.67 | 10.00 | 1.067 | 0.065 |
| Replication | Sham | 10.67 | 10.67 | 1.000 | 0.000 |
| Replication | Sham | 11.67 | 11.83 | 0.986 | -0.014 |
| Replication | Qigong | 7.50 | 11.67 | 0.643 | -0.442 |
| Replication | Qigong | 8.17 | 7.50 | 1.089 | 0.085 |
| Replication | Qigong | 11.83 | 10.67 | 1.109 | 0.104 |
